# Supplementary material for: Reconstruction of warm-season temperatures in central Europe during the past 60 000 years from lacustrine branched glycerol dialkyl glycerol tetraethers (brGDGTs)
Source: Copernicus journal article supplement (doi:10.5194/cp-20-841-2024), 2024-04-08
Supplement: Supplementary file 1 [file cp-20-841-2024-supplement.pdf]

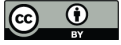

*Supplement of*

**Reconstruction of warm-season temperatures in central Europe during the past 60 000 years from lacustrine branched glycerol dialkyl glycerol tetraethers (brGDGTs)**

**Paul D. Zander et al.**

*Correspondence to:* Paul D. Zander ([paul.zander@mpic.de](mailto:paul.zander@mpic.de))

The copyright of individual parts of the supplement might differ from the article licence.



**Table S1: Summary of key indices and temperature estimates obtained from 17 separate extractions and measurements of a single sample to test reproducibility of the laboratory and analytical method.**

|                              | <b>MBT<sub>5Me</sub></b> | <b>BIT</b> | <b>fIIIa''<sup>1</sup></b> | <b>ΣIIIa/ΣIIa</b> | <b>brGDGTs<br/>(ng/g)</b> | <b>isoGDGTs<br/>(ng/g)<sup>2</sup></b> | <b>Cren<br/>(ng/g)<sup>2</sup></b> | <b>BayMBT<br/>(° C)</b> | <b>BayMBT_adj<br/>(° C)</b> | <b>Raberg21<br/>(° C)</b> | <b>Raberg21_adj<br/>(° C)</b> |
|------------------------------|--------------------------|------------|----------------------------|-------------------|---------------------------|----------------------------------------|------------------------------------|-------------------------|-----------------------------|---------------------------|-------------------------------|
| Mean (n=17)                  | 0.193                    | 0.591      | 0.018                      | 2.225             | 1815.2                    | 2749.1                                 | 1248.0                             | 4.37                    | 5.20                        | 6.28                      | 6.53                          |
| Standard<br>Deviation (n=17) | 0.006                    | 0.018      | 0.002                      | 0.193             | 298.7                     | 585.4                                  | 256.0                              | 0.18                    | 0.24                        | 0.10                      | 0.14                          |

<sup>1</sup> fIIIa'' calculated as a fraction of all measured brGDGTs

<sup>2</sup> Includes crenarchaeol and crenarchaeol isomer
